# Supplementary material
Source: publisher figshare collection journal article supplement (https://acs.figshare.com/ndownloader/files/4158670)
Supplement: Supplementary file 1 [file 4158670]

Supporting information

# Solid State NMR Study of Thermal Processes in Nano-assemblies Formed by Dipeptides

*Magdalena Jaworska, Agata Jeziorna, Ewelina Drabik, Marek J. Potrzebowski\**

Centre of Molecular and Macromolecular Studies, Polish Academy of Sciences, Sienkiewicza  
112, 90-363 Lodz, Poland

\* [marekpot@cbmm.lodz.pl](mailto:marekpot@cbmm.lodz.pl)

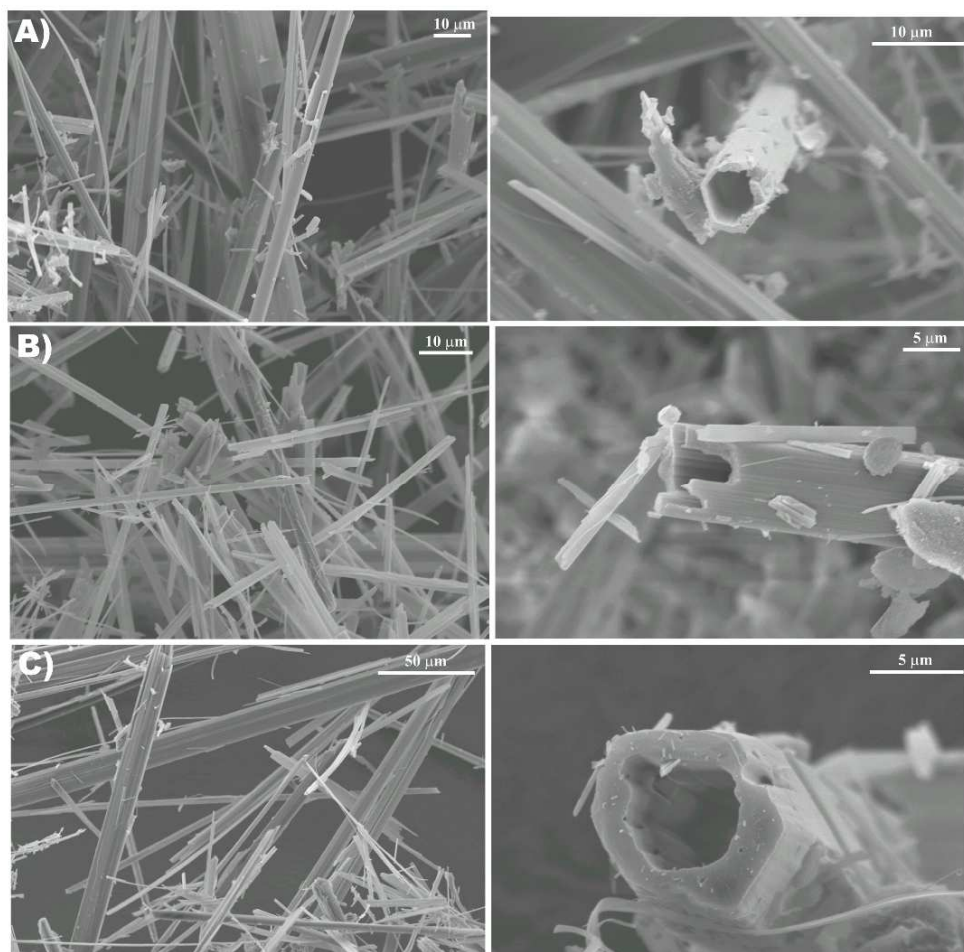

**Figure A.** SEM images at different magnifications of A) FF nanotubes after removing water, B) FF nanotubes after water diffusion and C) FF nanotubes after methanol diffusion.

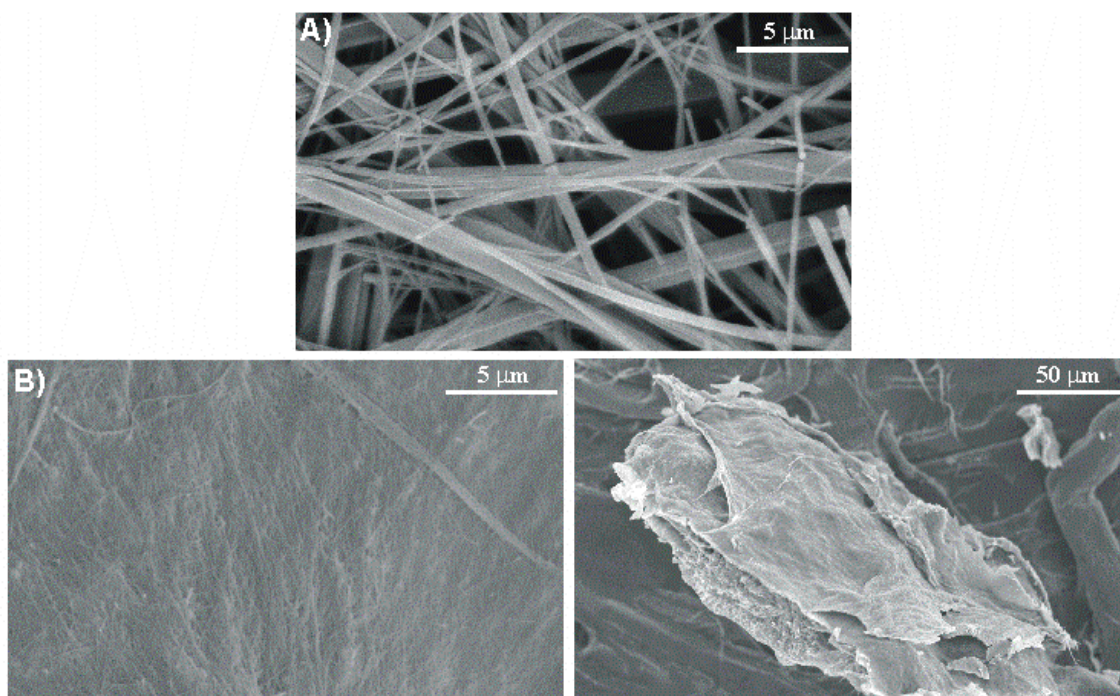

**Figure B.** SEM images at different magnifications of A) DF-OMe after heating at 403 K, B) DF DKP - (DF-OMe after heating at 463 K).
